# Supplementary material for: Associations between prediagnostic aspirin use and ovarian tumor gene expression
Source: PubMed Central journal article supplement (PMC10523980; doi:10.1002/cam4.6386), 2023-08-01

# Pathways

database

Genes

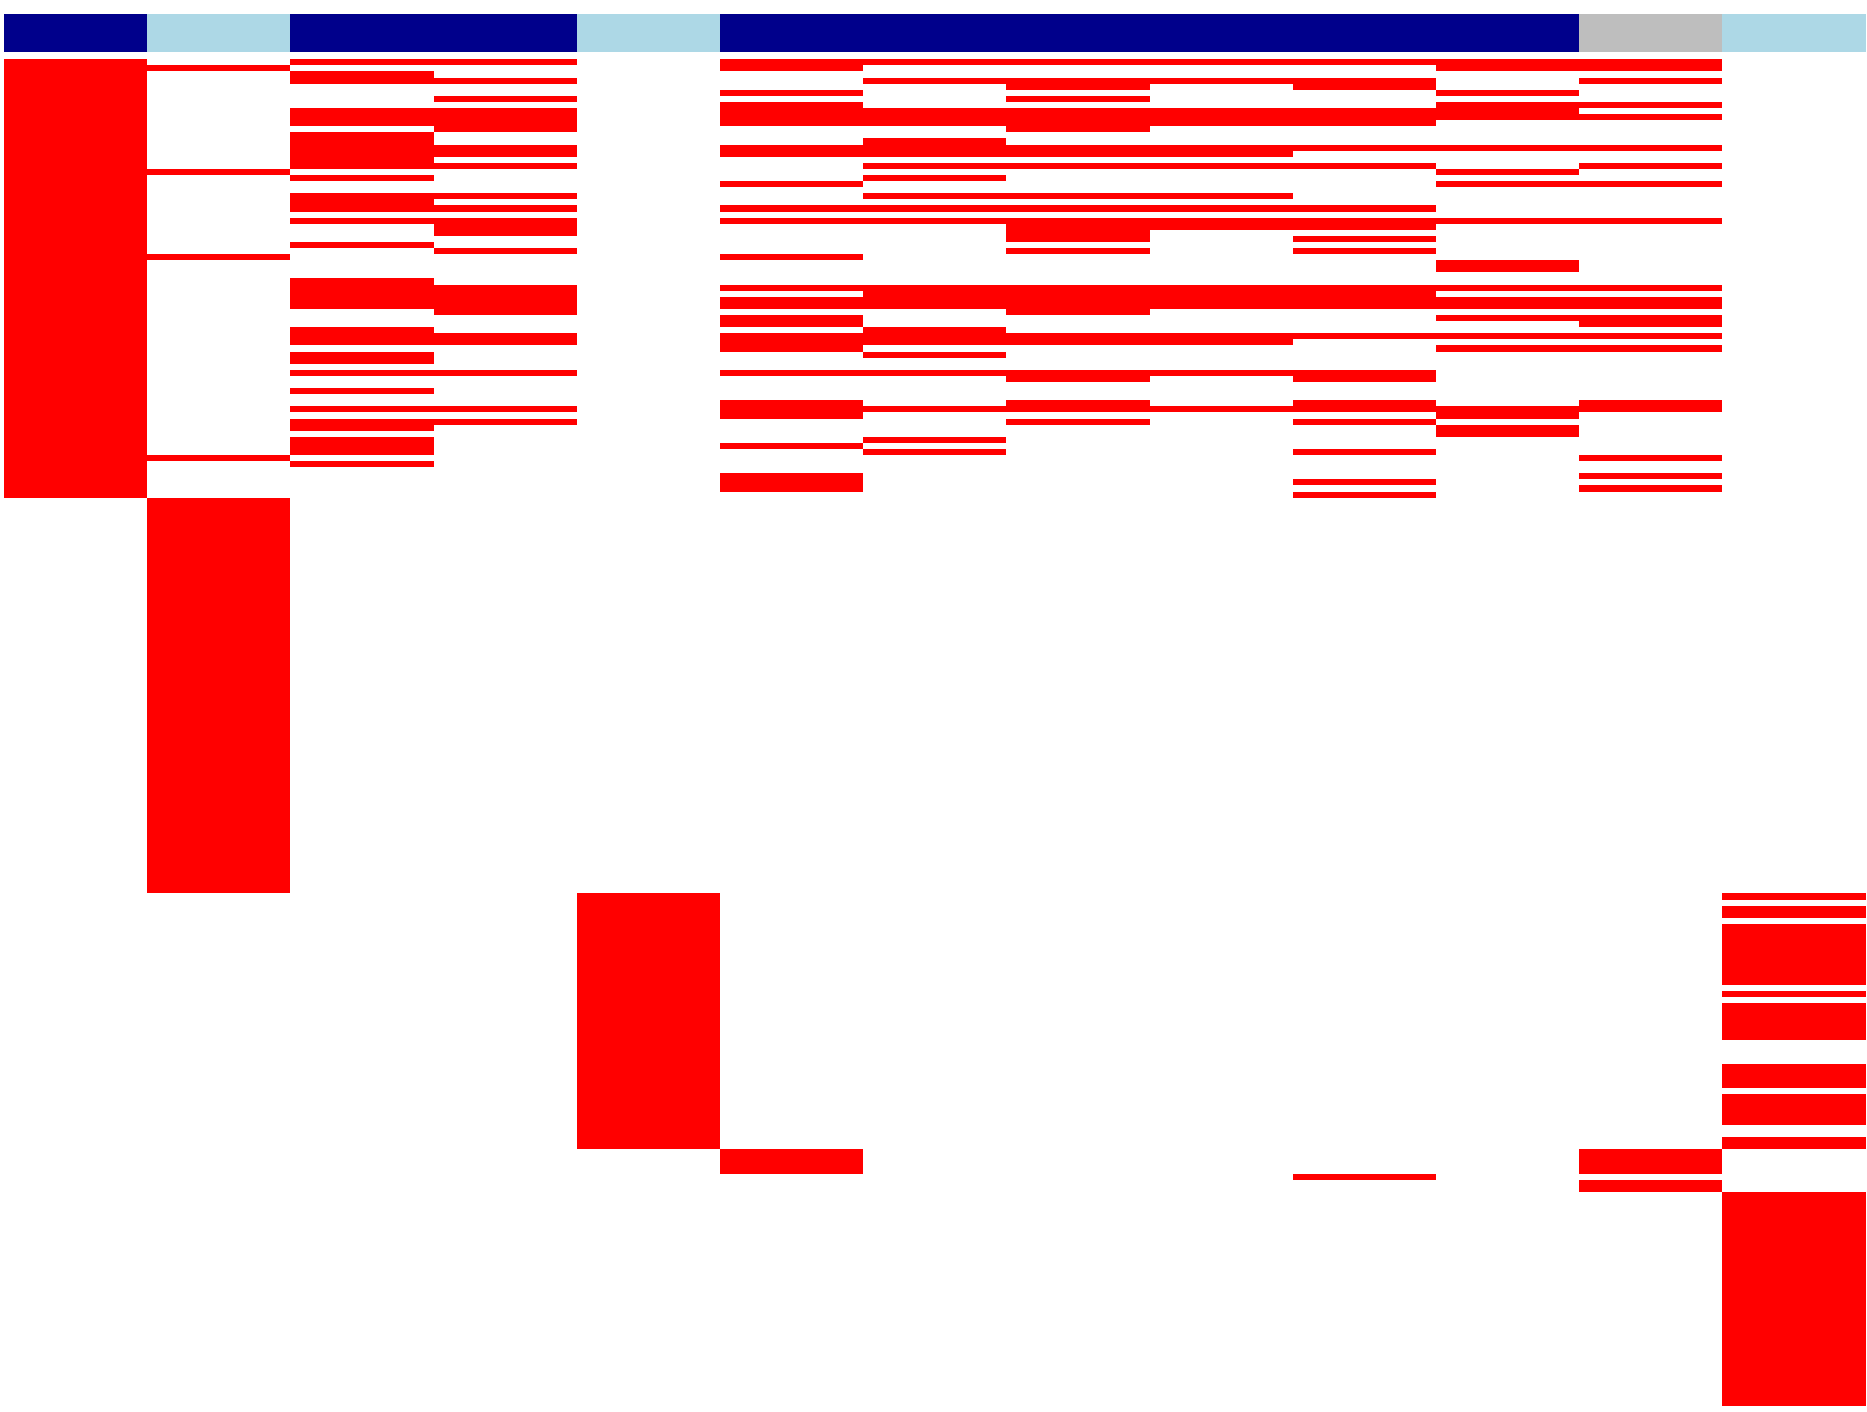

**Legend**

- Match (Red)
- No Match (White)

**database**

- hallmarks (Light Blue)
- kegg (Dark Blue)
- reactome (Grey)

**pathway\_type**

- Extracellular (Yellow)
- Inflam (Orange)

pathway\_type

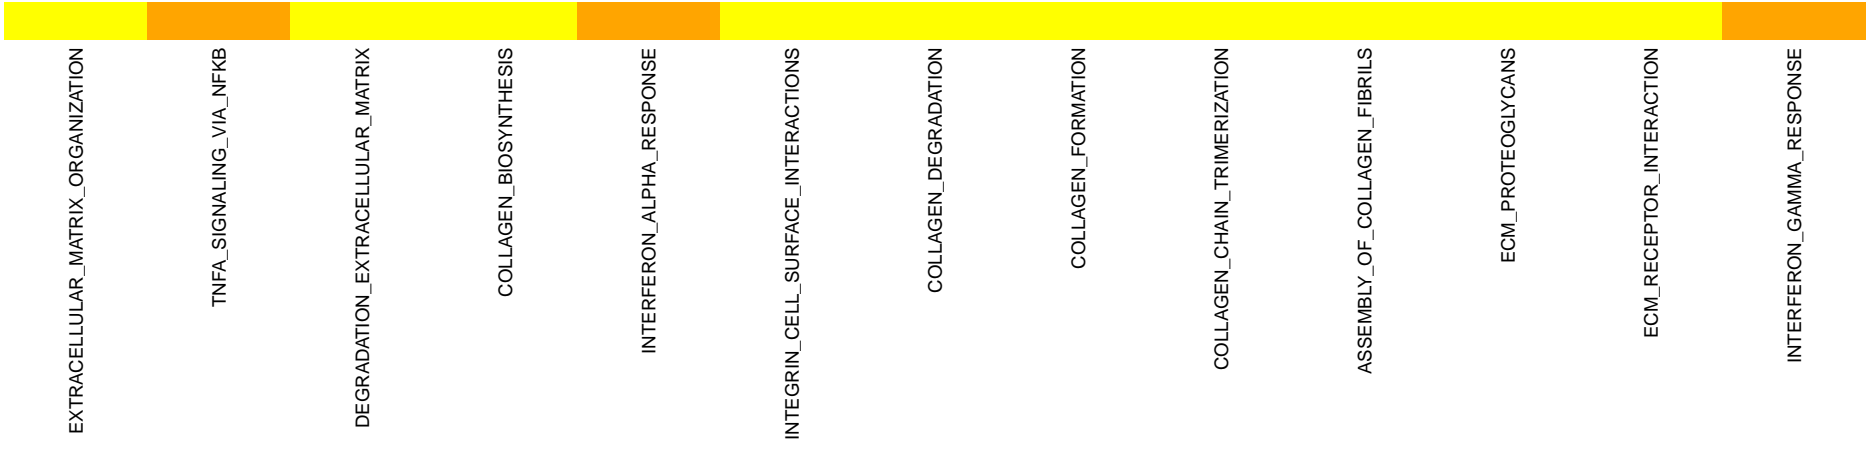

Supplement: CAM4-12-18405-s004.pdf [file CAM4-12-18405-s004.pdf]
