# Supplementary material for: Associations between prediagnostic aspirin use and ovarian tumor gene expression
Source: PubMed Central journal article supplement (PMC10523980; doi:10.1002/cam4.6386), 2023-08-01
Supplement: CAM4-12-18405-s005.pdf [file CAM4-12-18405-s005.pdf]

# Pathways

database

Genes

**Legend**

- Match
- No Match

**database**

- hallmarks
- kegg
- reactome

**pathway\_type**

- Estrogen
- Immune
- Inflam

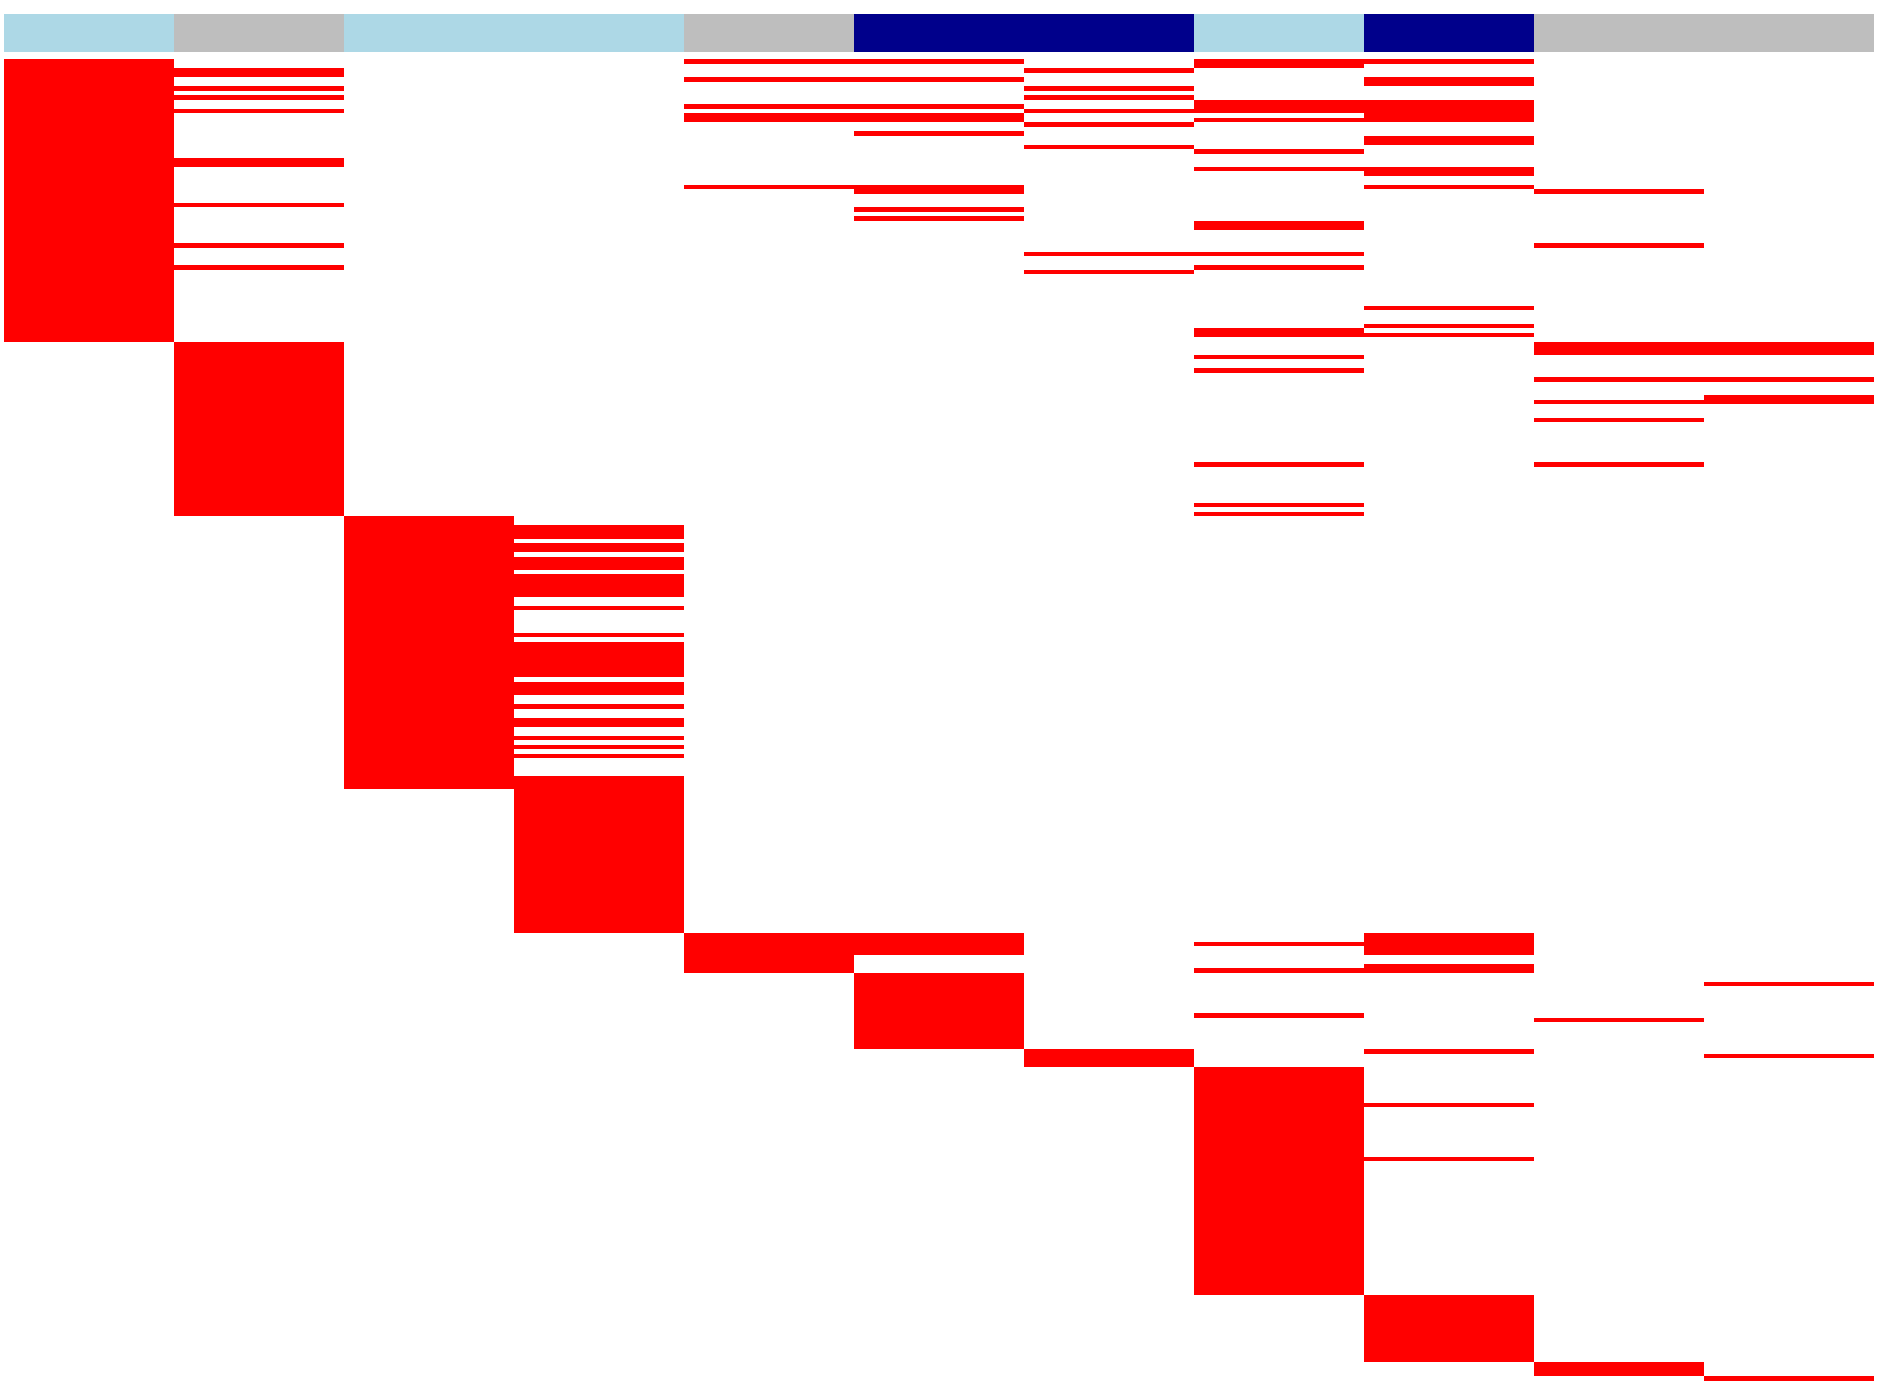

ALLOGRAFT\_REJECTION  
A\_LYMPHOID\_AND\_A\_NON\_LYMPHOID\_CELL  
ESTROGEN\_RESPONSE\_LATE  
ESTROGEN\_RESPONSE\_EARLY  
CHEMOKINE\_RECEPTORS\_BIND\_CHEMOKINES  
CHEMOKINE\_SIGNALING\_PATHWAY  
PRIMARY\_IMMUNODEFICIENCY  
INTERFERON\_GAMMA\_RESPONSE  
CYTOKINE\_RECEPTOR\_INTERACTION  
FCGR\_ACTIVATION  
BCR\_LEADING\_TO\_GEN\_OF\_SECOND\_MESSENGERS

pathway\_type
